# Supplementary material for: Morphological Studies of Composite Spin Crossover@SiO2 Nanoparticles
Source: MDPI journal article supplement (doi:10.3390/nano11123169), 2021-11-23
Supplement: s1 [file s1]

# Morphological Studies of Composite Spin Crossover@SiO<sub>2</sub> Nanoparticles

Yue Zan, Lionel Salmon \* and Azzedine Bousseksou \*

Laboratoire de Chimie de Coordination, CNRS & Université de Toulouse (INPT, UPS), 205 Route de Narbonne, 31400 Toulouse, France; yue.zan@lcc-toulouse.fr

\* Correspondence: lionel.salmon@lcc-toulouse.fr (L.S.); azzedine.bousseksou@lcc-toulouse.fr (A.B.)

**Table S1.** Experimental conditions for the synthesis of samples 1-18.

| sample | Temperature (°C) | *V <sub>H2O</sub> (mL) | ω  | *V <sub>TEOS</sub> (mL) | TEOS inclusion phase    | V <sub>Ammoniac</sub> |
|--------|------------------|------------------------|----|-------------------------|-------------------------|-----------------------|
| 1      | 20               | 0.5                    | 10 | 0                       | ---                     | 0                     |
| 2      | 20               | 0.5                    | 10 | 0.05                    | organic                 | 0                     |
| 3      | 20               | 0.5                    | 10 | 0.1                     | organic                 | 0                     |
| 4      | 20               | 0.5                    | 10 | 0.2                     | organic                 | 0                     |
| 5      | 0                | 0.5                    | 10 | 0.05                    | organic                 | 0                     |
| 6      | 30               | 0.5                    | 10 | 0.05                    | organic                 | 0                     |
| 7      | 60               | 0.5                    | 10 | 0.05                    | organic                 | 0                     |
| 8      | 20               | 0.5                    | 10 | 0.05                    | aqueous                 | 0                     |
| 9      | 20               | 0.5                    | 10 | 0.1                     | aqueous                 | 0                     |
| 10     | 20               | 0.5                    | 10 | 0.2                     | aqueous                 | 0                     |
| 11     | 20               | 0.5                    | 10 | 0.05                    | starting microemulsions | 0                     |
| 12     | 20               | 0.25                   | 5  | 0.05                    | starting microemulsions | 0                     |
| 13     | 20               | 0.5                    | 10 | 0.05                    | final microemulsion     | 0                     |
| 14     | 20               | 0.5                    | 10 | 0.05                    | final microemulsion     | 0.062                 |
| 15     | 20               | 0.5                    | 10 | 0.05                    | final microemulsion     | 0.124                 |
| 16     | 20               | 0.25                   | 5  | 0.05                    | final microemulsion     | 0                     |
| 17     | 20               | 0.25                   | 5  | 0.05                    | final microemulsion     | 0.062                 |
| 18     | 20               | 0.25                   | 5  | 0.05                    | final microemulsion     | 0.124                 |

\* Volume given for each starting microemulsion

**Table S2:** Elemental analyses and formula for sample 1-18

| Compound |  |       | C / % | H / % | N / % | B / % | Fe / % | Calculated Formula                                                                                                |
|----------|--|-------|-------|-------|-------|-------|--------|-------------------------------------------------------------------------------------------------------------------|
| 1        |  | exptl | 19.98 | 1.62  | 33.37 | 2.93  | 15.29  | $[\text{Fe}(\text{Htrz})_2(\text{Trz})](\text{BF}_4) \cdot (\text{H}_2\text{O})_{0.3}$                            |
|          |  |       | 20.02 | 1.49  | 33.38 | 2.81  | 15.34  |                                                                                                                   |
|          |  | calcd | 20.35 | 2.43  | 35.62 | 3.05  | 15.69  |                                                                                                                   |
| 2        |  | exptl | 19.03 | 1.53  | 31.94 | 2.67  | 14.16  | $[\text{Fe}(\text{Htrz})_2(\text{Trz})](\text{BF}_4) \cdot (\text{SiO}_2)_{0.6} \cdot (\text{H}_2\text{O})_{0.5}$ |
|          |  |       | 18.85 | 1.43  | 31.77 | 2.69  | 14.01  |                                                                                                                   |
|          |  | calcd | 18.30 | 2.28  | 32.03 | 2.74  | 14.11  |                                                                                                                   |
| 3        |  | exptl | 18.03 | 1.44  | 30.33 | 2.42  | 14.81  | $[\text{Fe}(\text{Htrz})_2(\text{Trz})](\text{BF}_4) \cdot (\text{SiO}_2)_{0.9} \cdot (\text{H}_2\text{O})_{0.1}$ |
|          |  |       | 18.16 | 1.60  | 30.54 | 2.42  | 14.78  |                                                                                                                   |
|          |  | calcd | 17.84 | 2.01  | 31.23 | 2.67  | 13.75  |                                                                                                                   |
| 4        |  | exptl | 19.22 | 1.94  | 32.08 | 2.69  | 14.87  | $[\text{Fe}(\text{Htrz})_2(\text{Trz})](\text{BF}_4) \cdot (\text{SiO}_2)_{0.5} \cdot (\text{H}_2\text{O})_{0.4}$ |
|          |  |       | 19.24 | 1.91  | 32.17 | 2.59  | 14.74  |                                                                                                                   |
|          |  | calcd | 18.67 | 2.28  | 32.68 | 2.80  | 14.39  |                                                                                                                   |
| 5        |  | exptl | 19.88 | 1.71  | 33.57 | 2.65  | 15.72  | $[\text{Fe}(\text{Htrz})_2(\text{Trz})](\text{BF}_4) \cdot (\text{SiO}_2)_{0.3} \cdot (\text{H}_2\text{O})_{0.4}$ |
|          |  |       | 19.80 | 1.50  | 33.26 | 2.57  | 15.81  |                                                                                                                   |
|          |  | calcd | 19.38 | 2.35  | 33.93 | 2.90  | 14.94  |                                                                                                                   |
| 6        |  | exptl | 17.21 | 1.38  | 28.81 | 2.44  | 15.12  | $[\text{Fe}(\text{Htrz})_2(\text{Trz})](\text{BF}_4) \cdot (\text{SiO}_2)_{1.1} \cdot (\text{H}_2\text{O})_{0.4}$ |
|          |  |       | 17.24 | 1.40  | 28.88 | 2.44  | 14.86  |                                                                                                                   |
|          |  | calcd | 17.03 | 2.11  | 29.81 | 2.55  | 13.13  |                                                                                                                   |
| 7        |  | exptl | 18.90 | 1.45  | 31.86 | 2.72  | 14.82  | $[\text{Fe}(\text{Htrz})_2(\text{Trz})](\text{BF}_4) \cdot (\text{SiO}_2)_{0.6} \cdot (\text{H}_2\text{O})_{0.3}$ |
|          |  |       | 18.83 | 1.48  | 31.64 | 2.65  | 14.70  |                                                                                                                   |
|          |  | calcd | 18.39 | 2.17  | 32.19 | 2.75  | 14.18  |                                                                                                                   |
| 8        |  | exptl | 19.64 | 1.43  | 33.05 | 2.75  | 15.53  | $[\text{Fe}(\text{Htrz})_2(\text{Trz})](\text{BF}_4) \cdot (\text{SiO}_2)_{0.3} \cdot (\text{H}_2\text{O})_{0.4}$ |
|          |  |       | 19.70 | 1.56  | 33.21 | 2.65  | 15.36  |                                                                                                                   |
|          |  | calcd | 19.21 | 2.34  | 33.62 | 2.88  | 14.81  |                                                                                                                   |
| 9        |  | exptl | 19.29 | 1.61  | 32.24 | 2.55  | 15.71  | $[\text{Fe}(\text{Htrz})_2(\text{Trz})](\text{BF}_4) \cdot (\text{SiO}_2)_{0.4} \cdot (\text{H}_2\text{O})_{0.5}$ |
|          |  |       | 19.29 | 1.56  | 32.23 | 2.47  | 15.83  |                                                                                                                   |
|          |  | calcd | 18.82 | 2.36  | 32.94 | 2.82  | 14.51  |                                                                                                                   |
| 10       |  | exptl | 18.27 | 1.08  | 29.40 | 2.74  | 14.18  | $[\text{Fe}(\text{Htrz})_2(\text{Trz})](\text{BF}_4) \cdot (\text{SiO}_2)_1 \cdot (\text{H}_2\text{O})_{0.4}$     |
|          |  |       | 18.22 | 1.14  | 29.26 | 2.72  | 13.83  |                                                                                                                   |
|          |  | calcd | 17.32 | 2.12  | 30.31 | 2.59  | 13.35  |                                                                                                                   |
| 11       |  | exptl | 19.12 | 1.50  | 32.57 | 3.12  | 14.94  | $[\text{Fe}(\text{Htrz})_2(\text{Trz})](\text{BF}_4) \cdot (\text{SiO}_2)_{0.5} \cdot (\text{H}_2\text{O})_{0.4}$ |
|          |  |       | 19.01 | 1.44  | 32.39 | 3.20  | 15.23  |                                                                                                                   |
|          |  | calcd | 18.79 | 2.29  | 32.88 | 2.81  | 14.48  |                                                                                                                   |
| 12       |  | exptl | 18.32 | 1.43  | 31.12 | 3.00  | 15.59  | $[\text{Fe}(\text{Htrz})_2(\text{Trz})](\text{BF}_4) \cdot (\text{SiO}_2)_{0.6} \cdot (\text{H}_2\text{O})_{0.6}$ |
|          |  |       | 18.28 | 1.46  | 31.11 | 2.93  | 15.34  |                                                                                                                   |
|          |  | calcd | 18.16 | 2.32  | 31.79 | 2.72  | 14.00  |                                                                                                                   |
| 13       |  | exptl | 18.28 | 1.48  | 28.74 | 2.82  | 14.23  |                                                                                                                   |

|    |  |       |       |      |       |      |       |                                                                                                                          |
|----|--|-------|-------|------|-------|------|-------|--------------------------------------------------------------------------------------------------------------------------|
|    |  |       | 18.40 | 1.75 | 28.97 | 2.83 | 14.12 | [Fe(Htrz) <sub>2</sub> (Trz)](BF <sub>4</sub> )·(SiO <sub>2</sub> ) <sub>1.1</sub><br>·(H <sub>2</sub> O) <sub>0.4</sub> |
|    |  | calcd | 17.08 | 2.08 | 29.89 | 2.56 | 13.16 |                                                                                                                          |
| 14 |  | exptl | 16.37 | 1.38 | 27.12 | 2.30 | 12.22 | [Fe(Htrz) <sub>2</sub> (Trz)](BF <sub>4</sub> )·(SiO <sub>2</sub> ) <sub>1.6</sub><br>·(H <sub>2</sub> O) <sub>0.5</sub> |
|    |  |       | 17.01 | 1.33 | 28.24 | 2.30 | 12.20 |                                                                                                                          |
|    |  | calcd | 15.98 | 1.99 | 27.98 | 2.39 | 12.32 |                                                                                                                          |
| 15 |  | exptl | 17.35 | 2.41 | 19.52 | 1.97 | 12.50 | [Fe(Htrz) <sub>2</sub> (Trz)](BF <sub>4</sub> )·(SiO <sub>2</sub> ) <sub>2.7</sub><br>·(H <sub>2</sub> O) <sub>1.2</sub> |
|    |  |       | 17.52 | 2.57 | 19.81 | 2.01 | 12.89 |                                                                                                                          |
|    |  | calcd | 13.24 | 1.91 | 23.16 | 1.98 | 10.20 |                                                                                                                          |
| 16 |  | exptl | 17.06 | 1.58 | 26.08 | 2.62 | 13.40 | [Fe(Htrz) <sub>2</sub> (Trz)](BF <sub>4</sub> )·(SiO <sub>2</sub> ) <sub>1.7</sub><br>·(H <sub>2</sub> O) <sub>0.5</sub> |
|    |  |       | 17.08 | 1.39 | 26.33 | 2.53 | 13.06 |                                                                                                                          |
|    |  | calcd | 15.68 | 1.95 | 27.45 | 2.35 | 12.09 |                                                                                                                          |
| 17 |  | exptl | 15.11 | 1.38 | 22.46 | 2.23 | 12.67 | [Fe(Htrz) <sub>2</sub> (Trz)](BF <sub>4</sub> )·(SiO <sub>2</sub> ) <sub>2.7</sub><br>·(H <sub>2</sub> O) <sub>0.7</sub> |
|    |  |       | 14.92 | 1.37 | 22.23 | 2.25 | 12.70 |                                                                                                                          |
|    |  | calcd | 13.76 | 1.79 | 24.09 | 2.06 | 10.61 |                                                                                                                          |
| 18 |  | exptl | 13.34 | 2.01 | 19.14 | 1.62 | 13.45 | [Fe(Htrz) <sub>2</sub> (Trz)](BF <sub>4</sub> )·(SiO <sub>2</sub> ) <sub>3.6</sub><br>·(H <sub>2</sub> O) <sub>1.2</sub> |
|    |  |       | 13.31 | 2.08 | 19.12 | 1.61 | 13.60 |                                                                                                                          |
|    |  | calcd | 12.28 | 1.77 | 21.50 | 1.84 | 9.47  |                                                                                                                          |

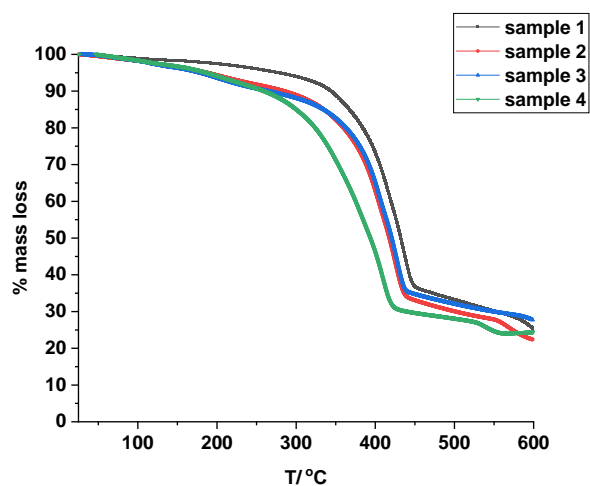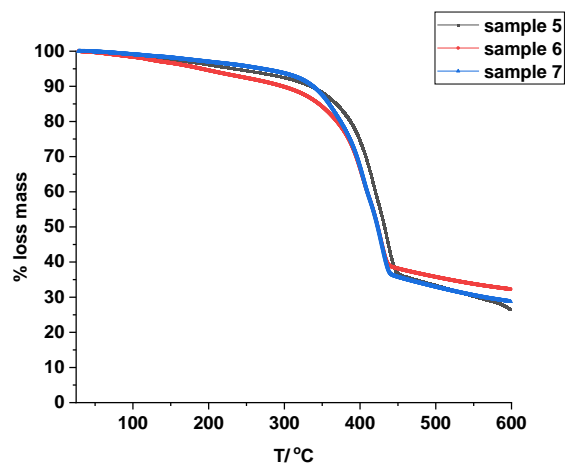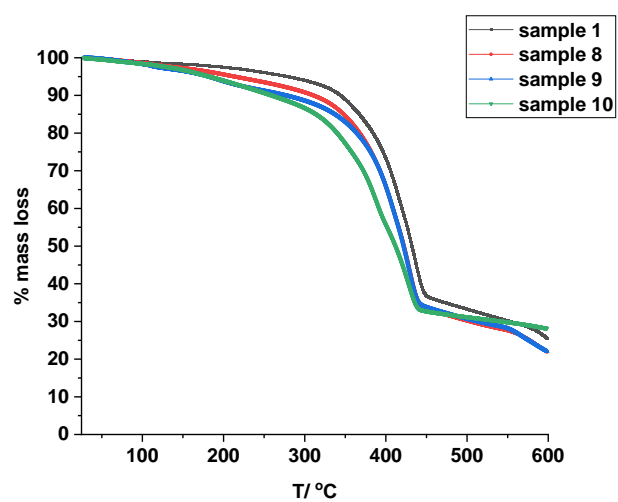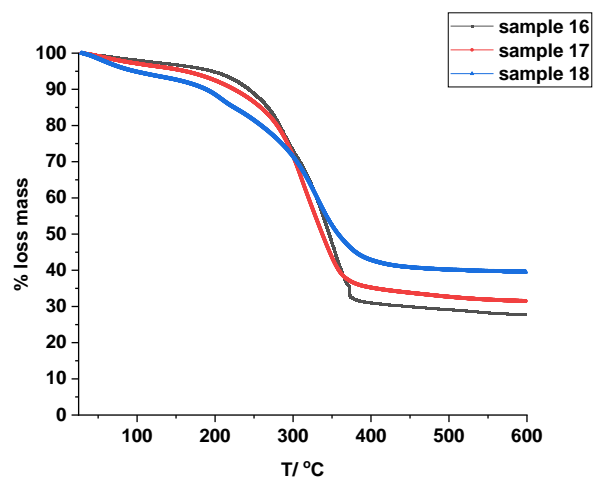

**Figure S1:** Thermogravimetric analyses

## TEM images of sample 2

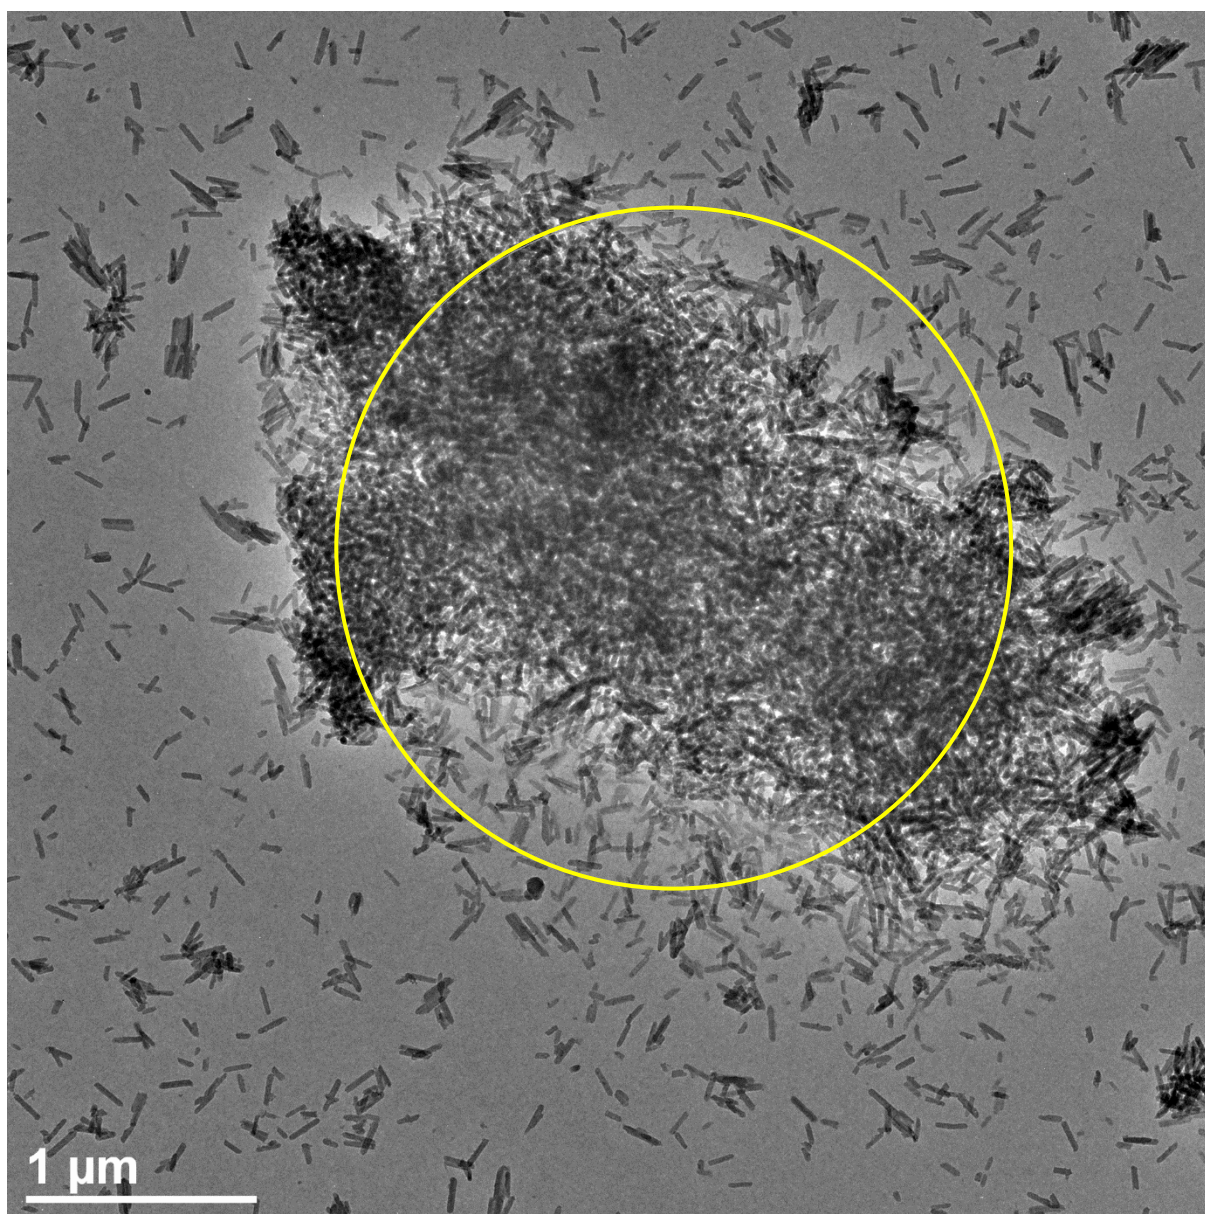

Yellow circle shows the measured area

| Element | Series   | norm. C<br>[wt.%] | Atom. C<br>[at.%] | Error (1 Sigma)<br>[wt.%] |
|---------|----------|-------------------|-------------------|---------------------------|
| Silicon | K-series | 14.91             | 25.84             | 0.21                      |
| Iron    | K-series | 85.09             | 74.16             | 2.63                      |
| Total:  |          | 100.00            | 100.00            |                           |

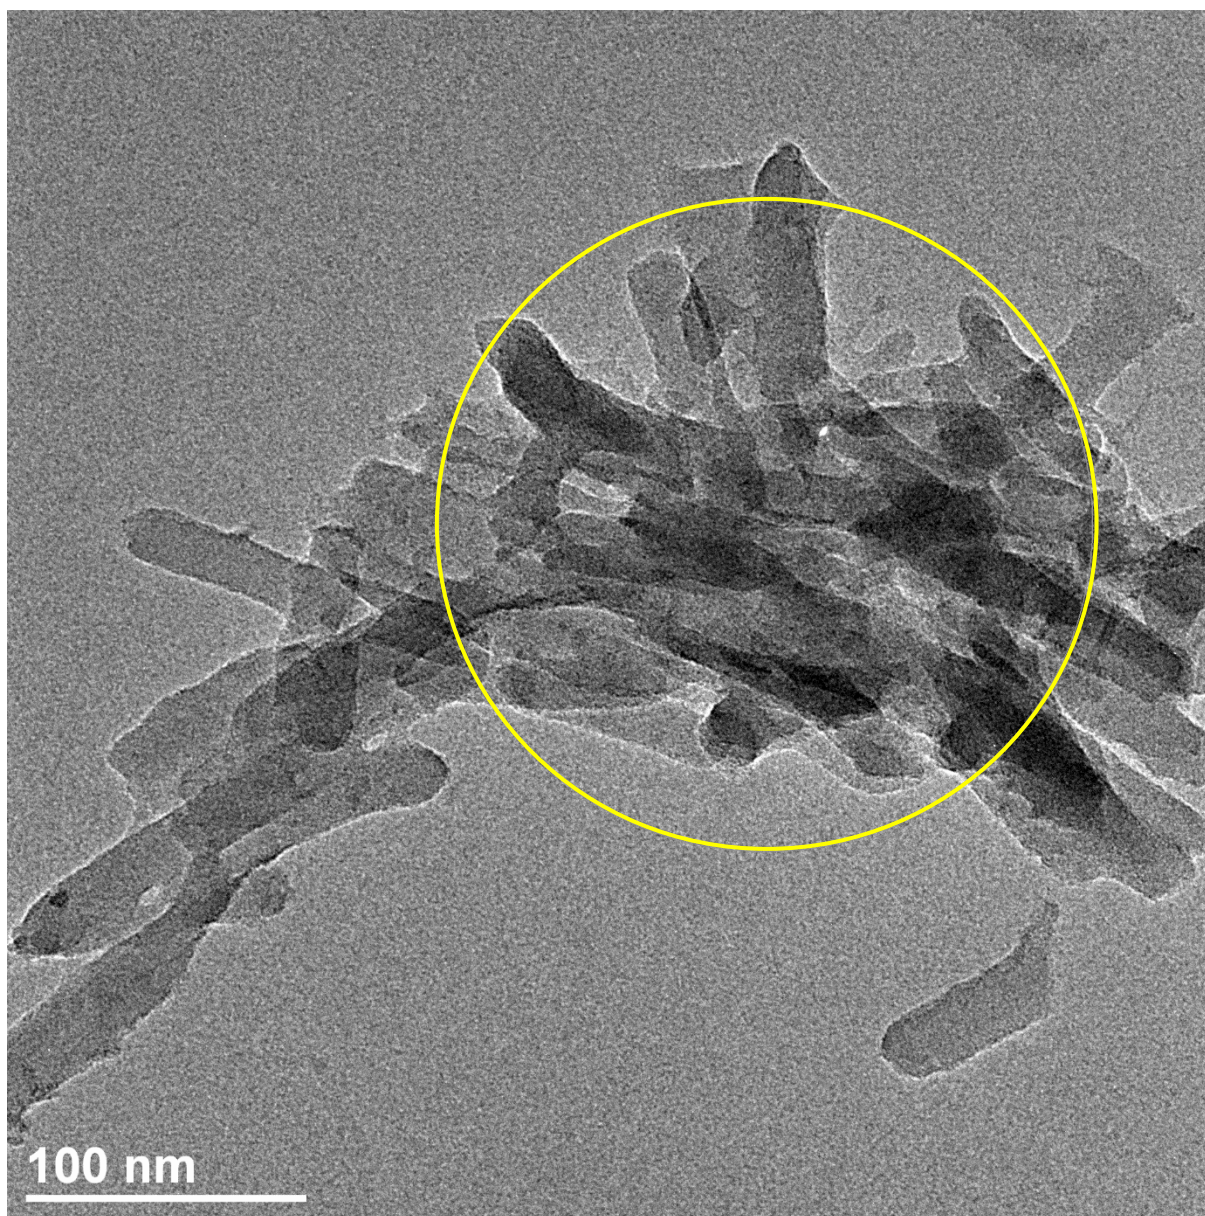

| Element | Series   | norm. C<br>[wt.%] | Atom. C<br>[at.%] | Error (1 Sigma)<br>[wt.%] |
|---------|----------|-------------------|-------------------|---------------------------|
| Silicon | K-series | 16.19             | 27.76             | 0.22                      |
| Iron    | K-series | 83.81             | 72.24             | 2.60                      |
| Total:  |          | 100.00            | 100.00            |                           |

TEM images of sample 3

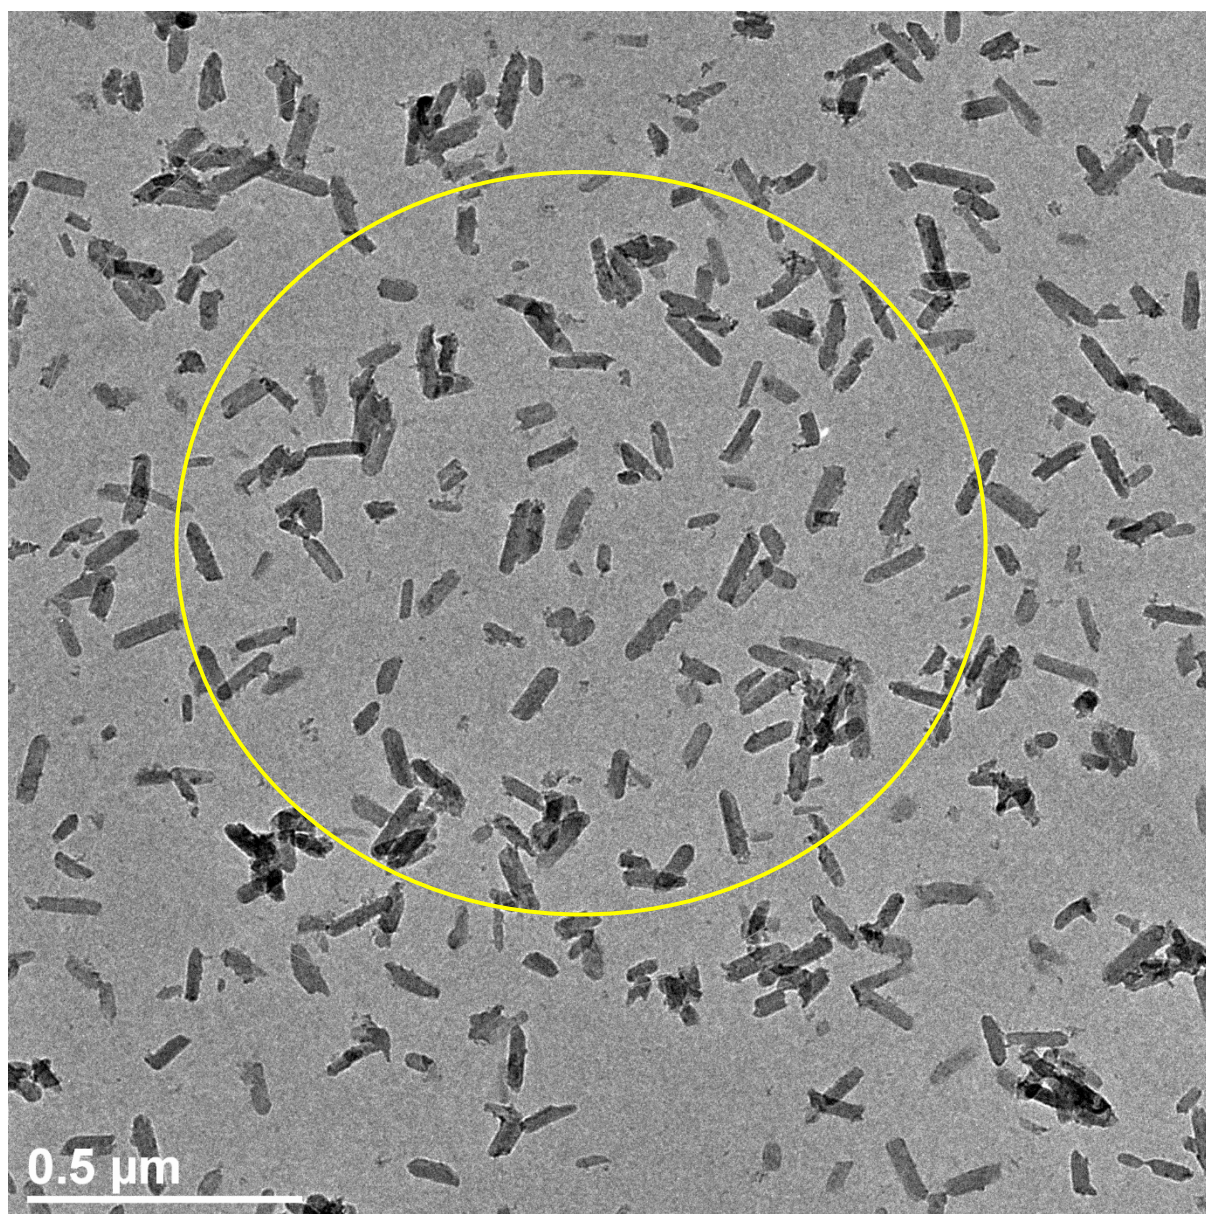

| Element | Series   | norm. C<br>[wt.%] | Atom. C<br>[at.%] | Error (1 Sigma)<br>[wt.%] |
|---------|----------|-------------------|-------------------|---------------------------|
| Iron    | K-series | 76.25             | 61.76             | 3.37                      |
| Silicon | K-series | 23.75             | 38.24             | 1.17                      |
| Total:  |          | 100.00            | 100.00            |                           |

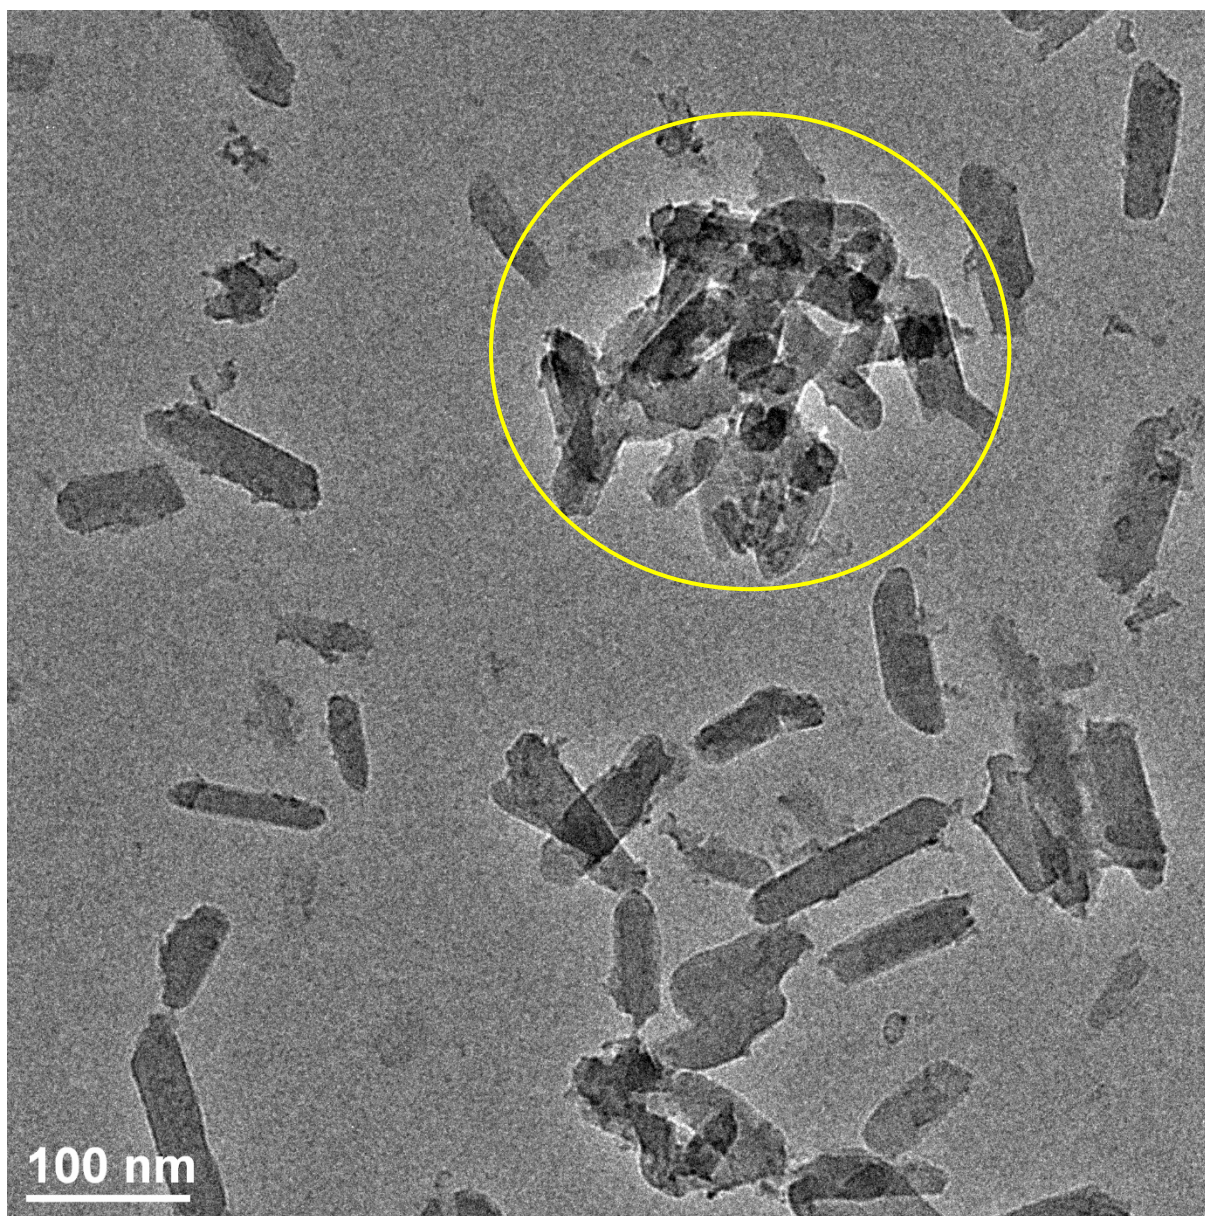

| Element | Series   | norm. C<br>[wt.%] | Atom. C<br>[at.%] | Error (1 Sigma)<br>[wt.%] |
|---------|----------|-------------------|-------------------|---------------------------|
| Iron    | K-series | 75.42             | 60.67             | 2.68                      |
| Silicon | K-series | 24.58             | 39.33             | 0.69                      |
| Total:  |          | 100.00            | 100.00            |                           |

Bright field HRSTEM images and the corresponding EDX distribution of Fe (in red) and Si (in blue) along cross-section line for core@shell nanoparticle sample 3.

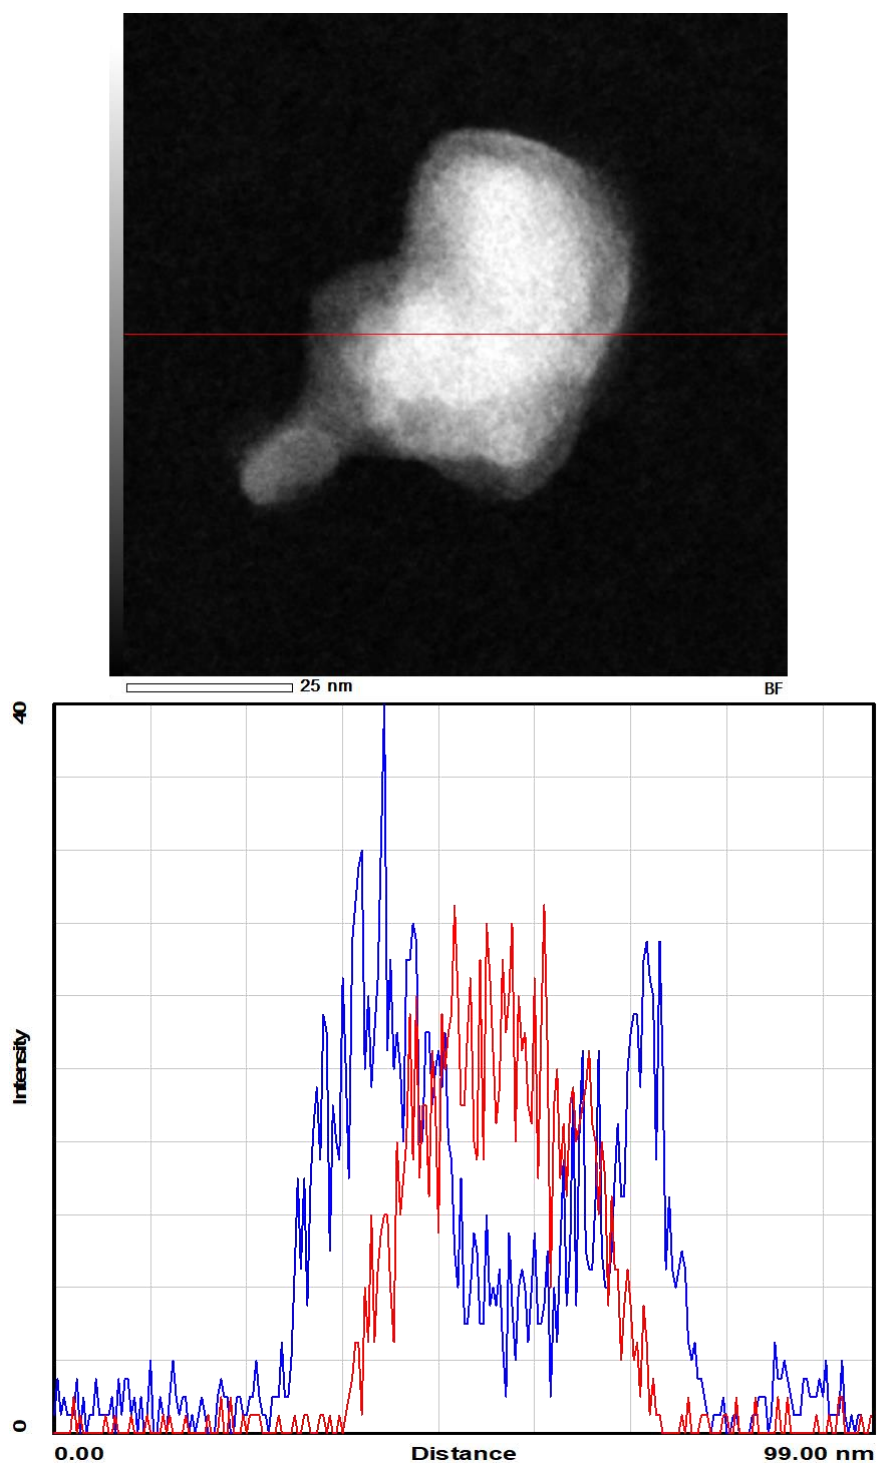

TEM images of sample 4

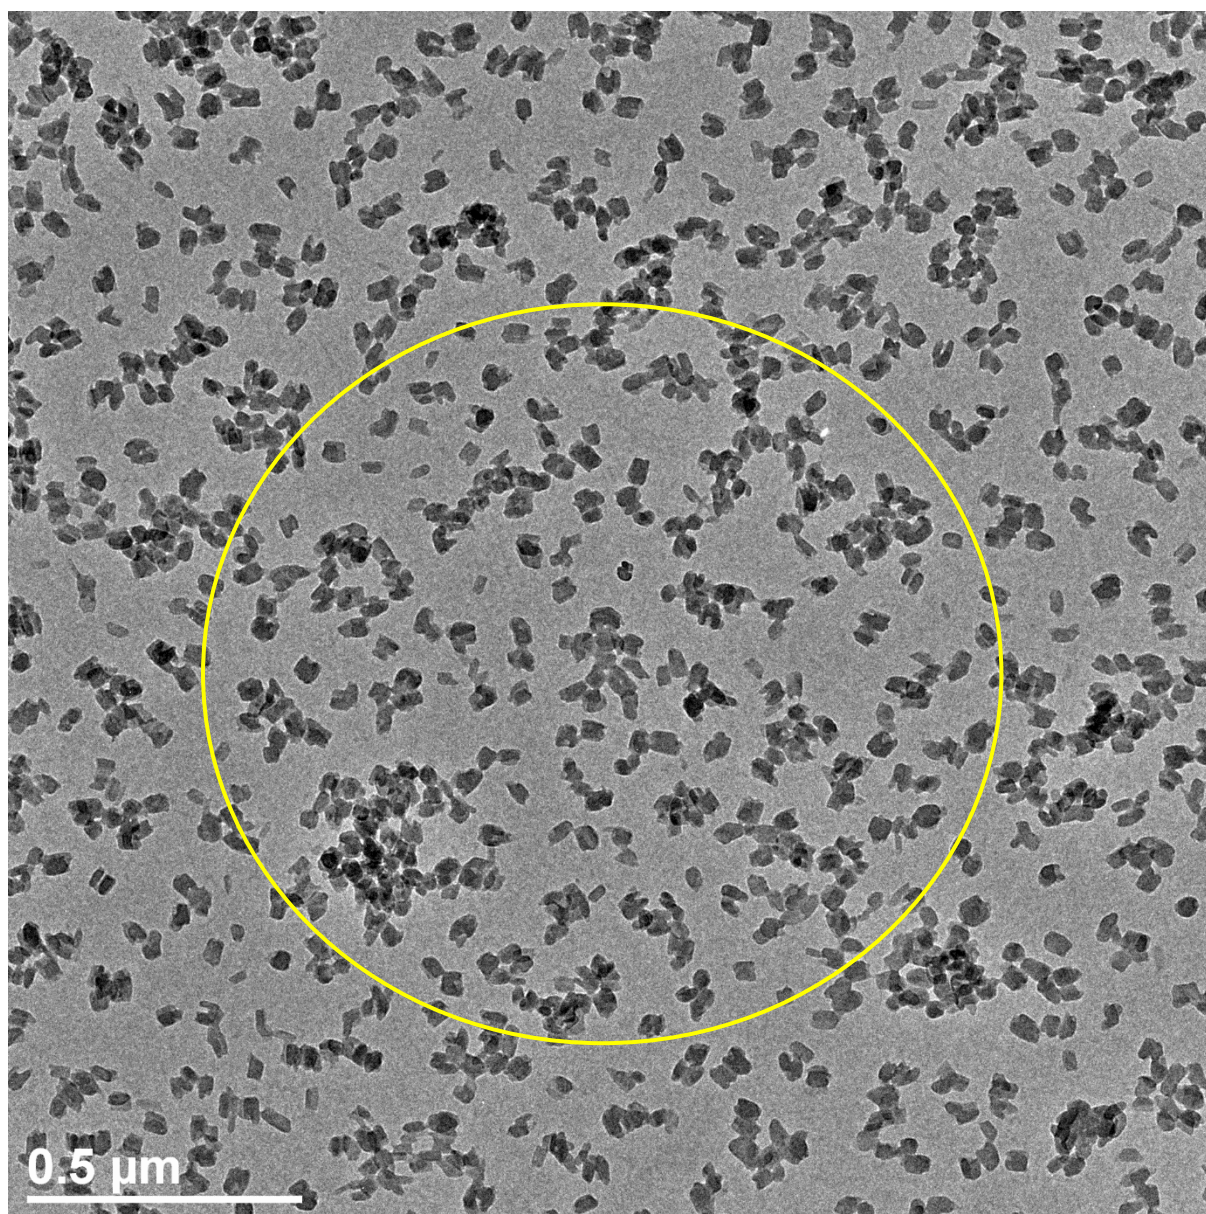

| Element | Series   | norm. C<br>[wt.%] | Atom. C<br>[at.%] | Error (1 Sigma)<br>[wt.%] |
|---------|----------|-------------------|-------------------|---------------------------|
| Iron    | K-series | 77.75             | 63.73             | 2.60                      |
| Silicon | K-series | 22.25             | 36.27             | 0.52                      |
| Total:  |          | 100.00            | 100.00            |                           |

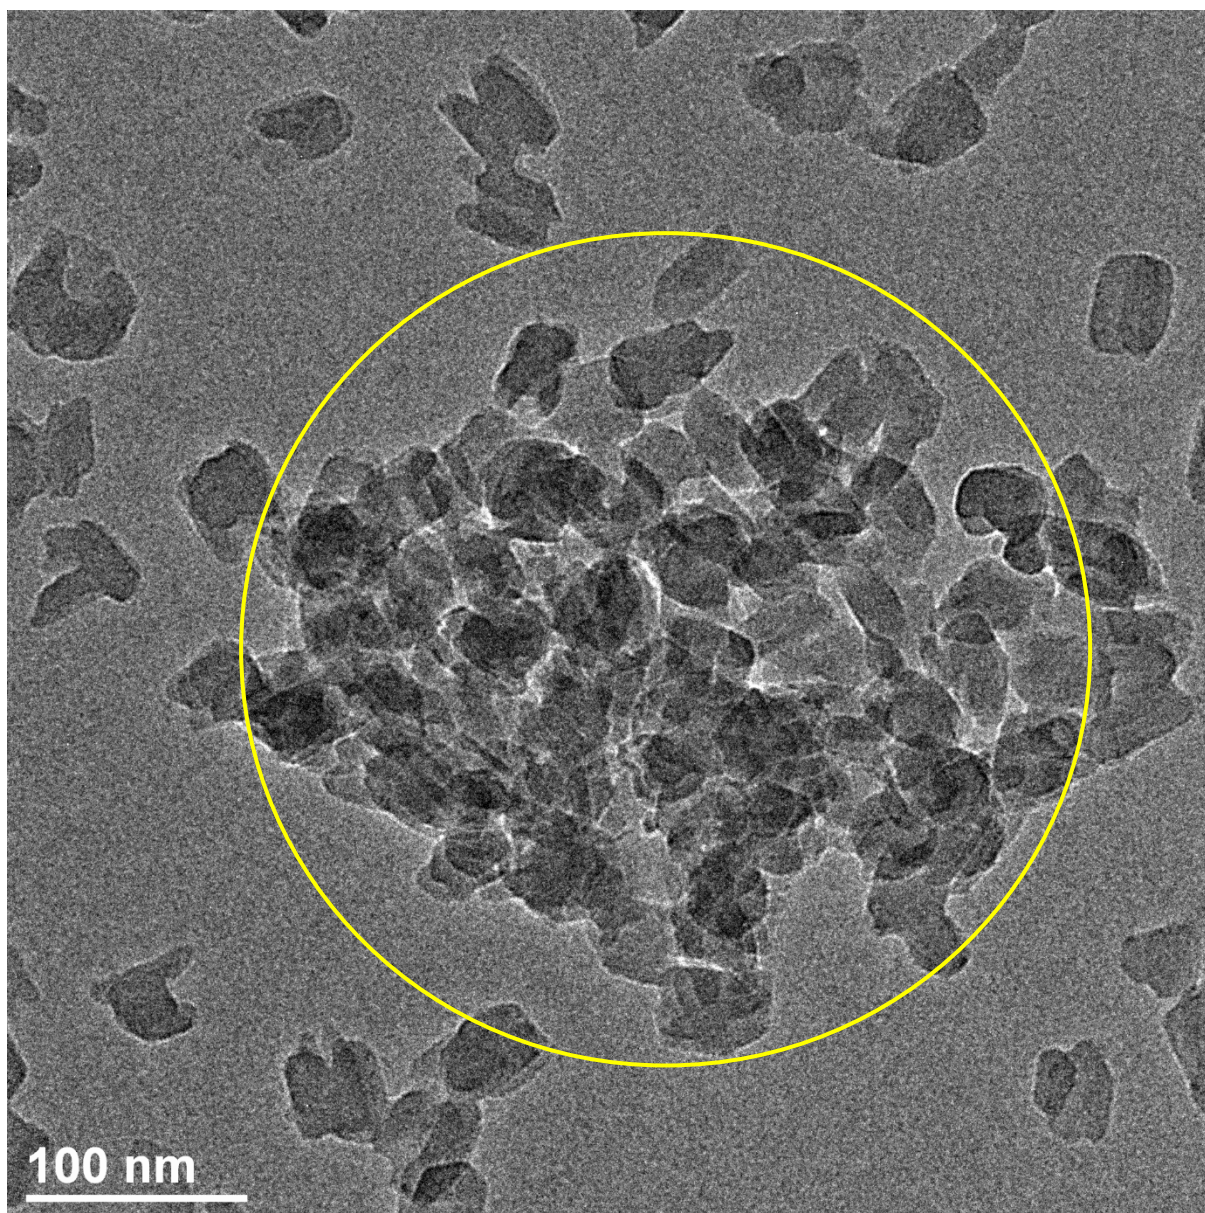

| Element | Series   | norm. C<br>[wt.%] | Atom. C<br>[at.%] | Error (1 Sigma)<br>[wt.%] |
|---------|----------|-------------------|-------------------|---------------------------|
| Iron    | K-series | 86.60             | 76.47             | 2.65                      |
| Silicon | K-series | 13.40             | 23.53             | 0.16                      |
| Total:  |          | 100.00            | 100.00            |                           |

# TEM images of sample 15

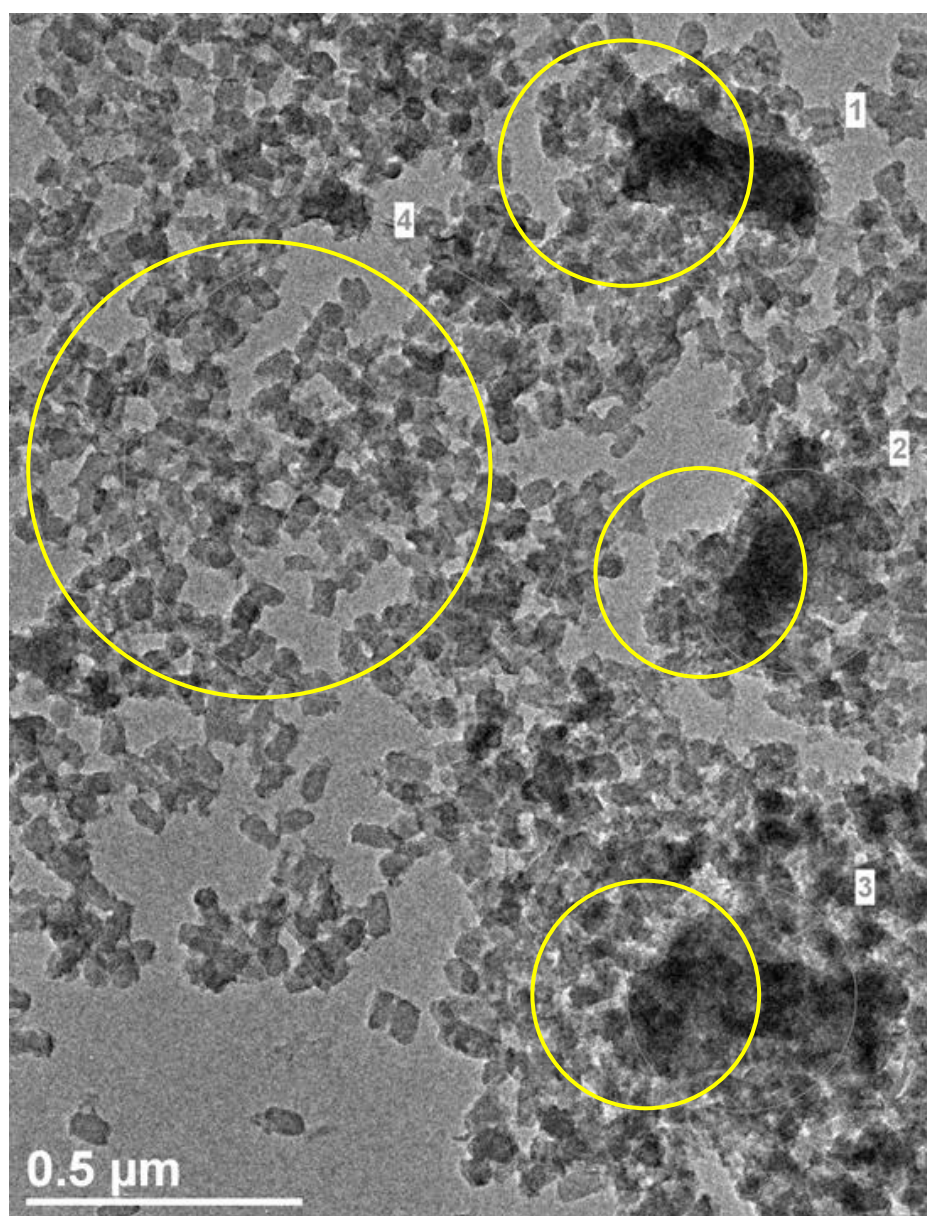

spot 3

| Element | Series   | norm. C<br>[wt.%] | Atom. C<br>[at.%] |
|---------|----------|-------------------|-------------------|
| Silicon | K-series | 29.63             | 45.57             |
| Iron    | K-series | 70.37             | 54.43             |
| Total:  |          | 100.00            | 100.00            |

spot 4

| Element | Series   | norm. C<br>[wt.%] | Atom. C<br>[at.%] |
|---------|----------|-------------------|-------------------|
| Silicon | K-series | 35.05             | 51.76             |
| Iron    | K-series | 64.95             | 48.24             |
| Total:  |          | 100.00            | 100.00            |

spot 1

| Element | Series   | norm. C<br>[wt.%] | Atom. C<br>[at.%] |
|---------|----------|-------------------|-------------------|
| Silicon | K-series | 30.53             | 46.63             |
| Iron    | K-series | 69.47             | 53.37             |
| Total:  |          | 100.00            | 100.00            |

spot 2

| Element | Series   | norm. C<br>[wt.%] | Atom. C<br>[at.%] |
|---------|----------|-------------------|-------------------|
| Silicon | K-series | 31.56             | 47.83             |
| Iron    | K-series | 68.44             | 52.17             |
| Total:  |          | 100.00            | 100.00            |

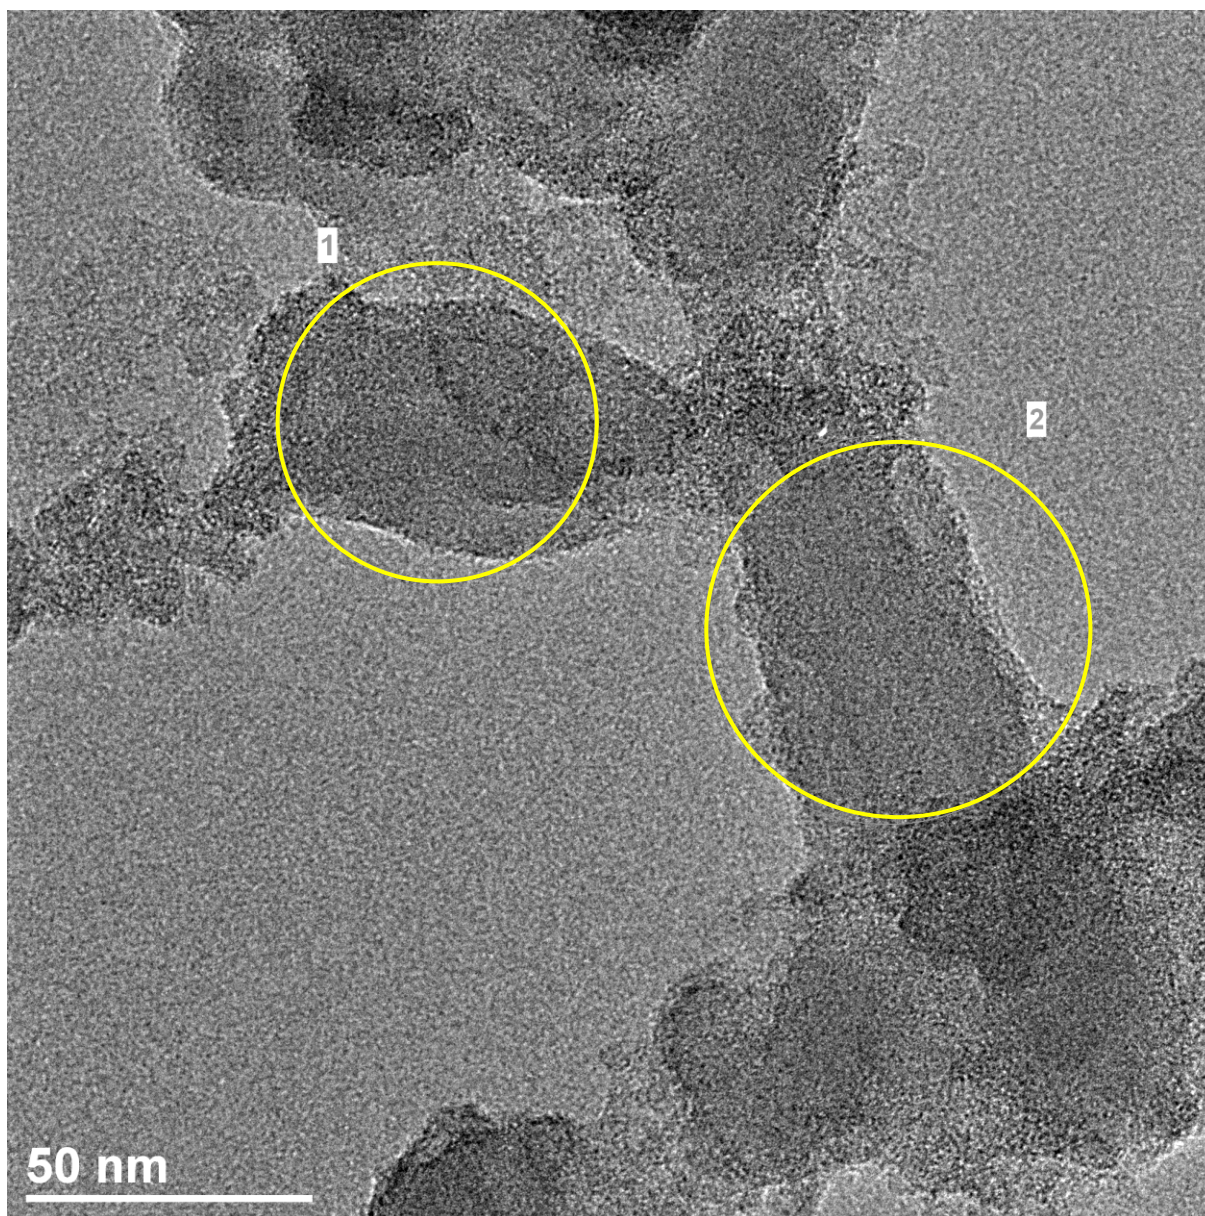

spot 1

| Element | Series   | norm. C<br>[wt.%] | Atom. C<br>[at.%] |
|---------|----------|-------------------|-------------------|
| <hr/>   |          |                   |                   |
| Silicon | K-series | 28.54             | 44.27             |
| Iron    | K-series | 71.46             | 55.73             |
| <hr/>   |          |                   |                   |
| Total:  |          | 100.00            | 100.00            |

spot 2

| Element | Series   | norm. C<br>[wt.%] | Atom. C<br>[at.%] |
|---------|----------|-------------------|-------------------|
| <hr/>   |          |                   |                   |
| Silicon | K-series | 30.58             | 46.69             |
| Iron    | K-series | 69.42             | 53.31             |
| <hr/>   |          |                   |                   |
| Total:  |          | 100.00            | 100.00            |

## TEM images of sample 18

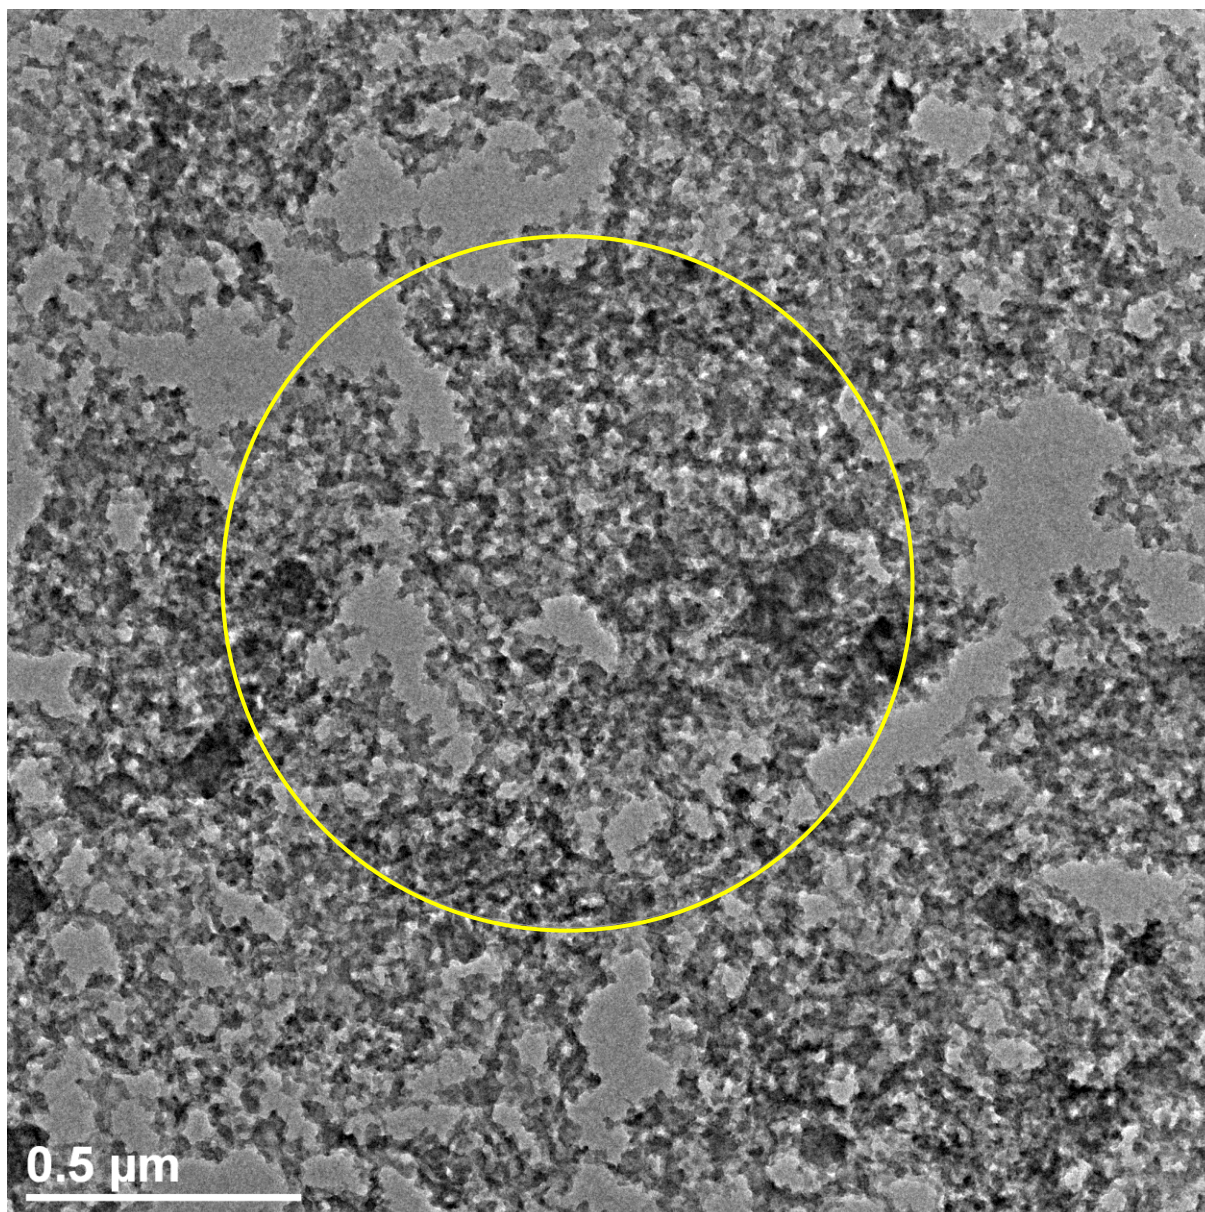

| Element | Series   | norm. C<br>[wt.%] | Atom. C<br>[at.%] |
|---------|----------|-------------------|-------------------|
| Iron    | K-series | 60.58             | 43.59             |
| Silicon | K-series | 39.42             | 56.41             |
| Total:  |          | 100.00            | 100.00            |

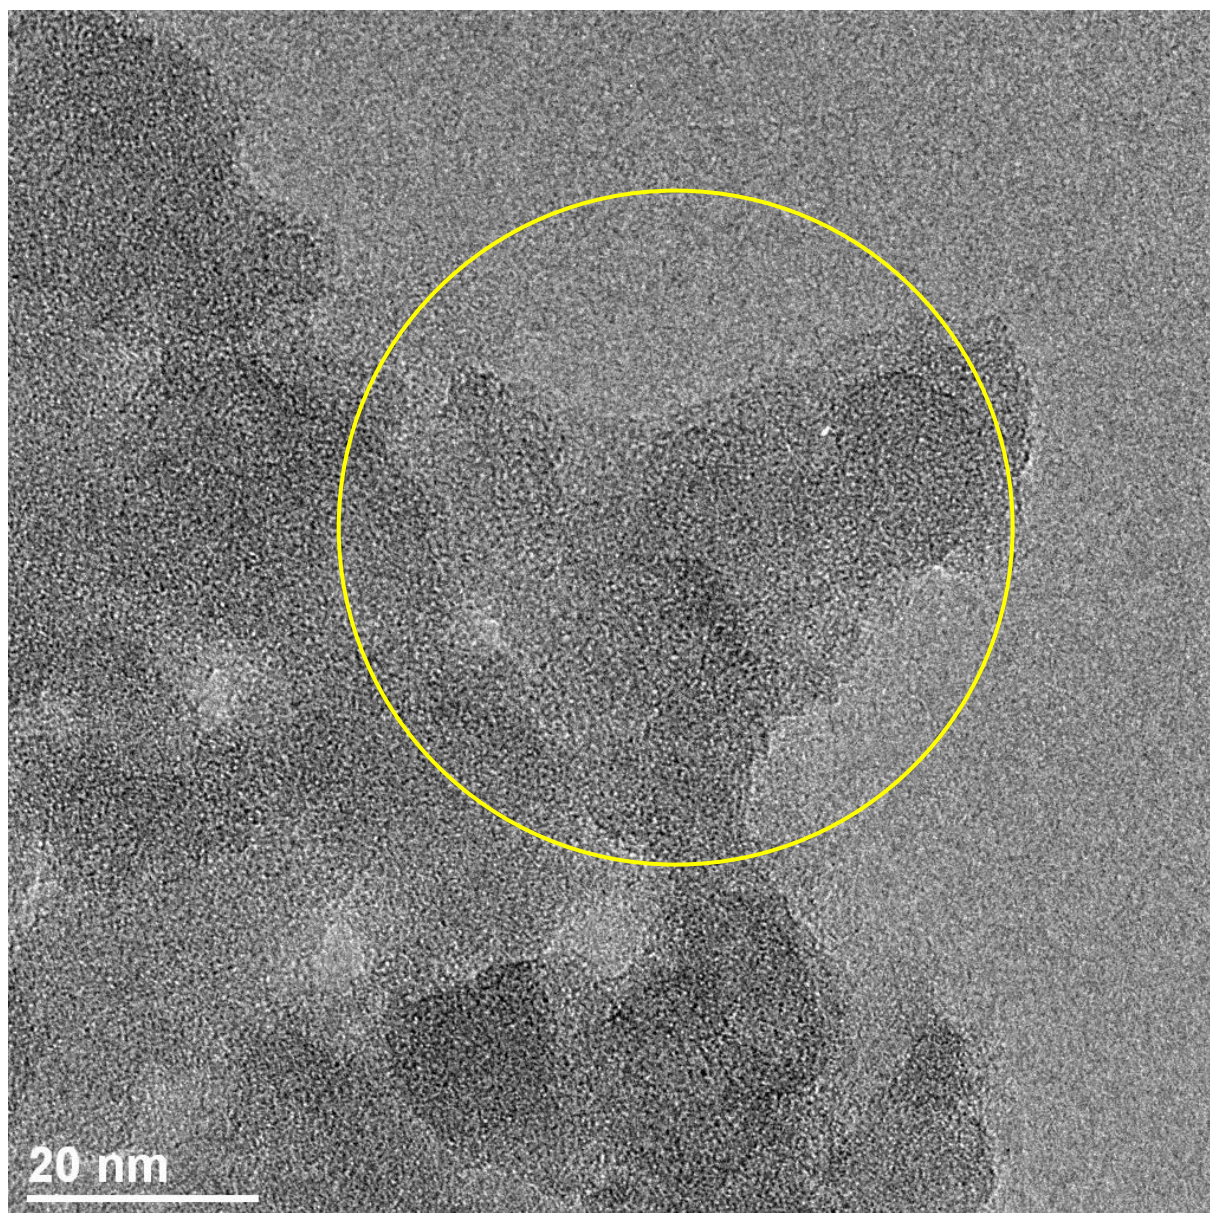

| Element | Series   | norm. C<br>[wt.%] | Atom. C<br>[at.%] |
|---------|----------|-------------------|-------------------|
| <hr/>   |          |                   |                   |
| Silicon | K-series | 48.29             | 65.00             |
| Iron    | K-series | 51.71             | 35.00             |
| <hr/>   |          |                   |                   |
| Total:  |          | 100.00            | 100.00            |

**Figure S2:** Transmission Electronic Microscopy (TEM) and EDX analyses

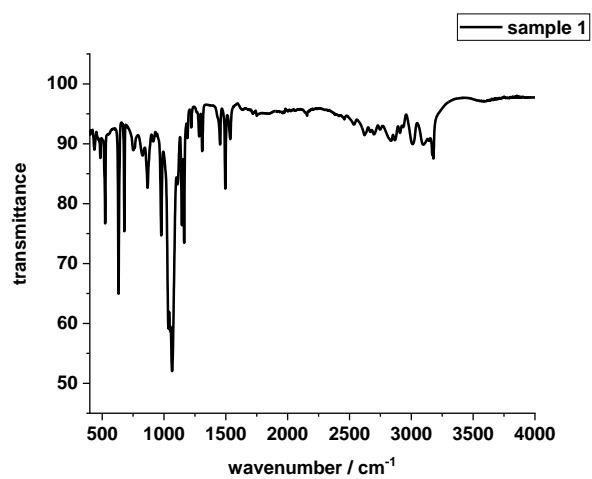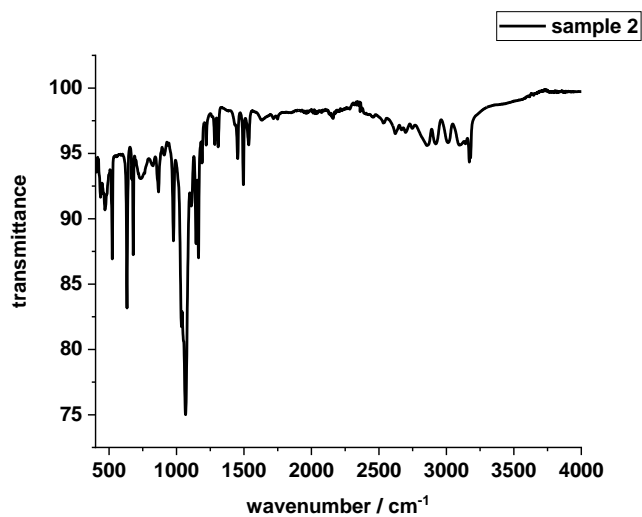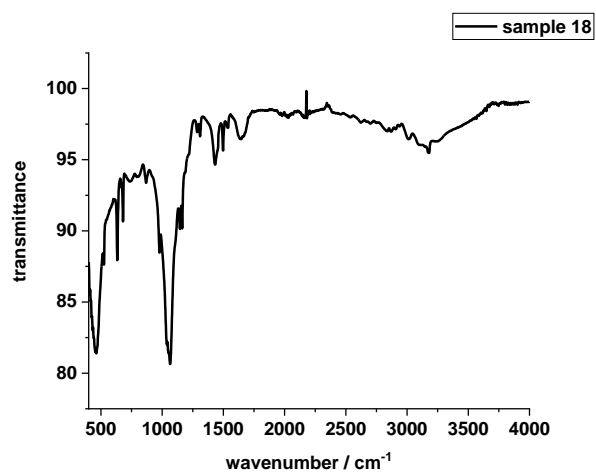

**Figure S3:** Infrared spectroscopy

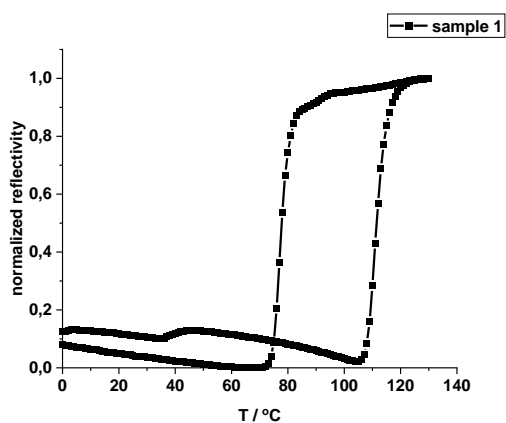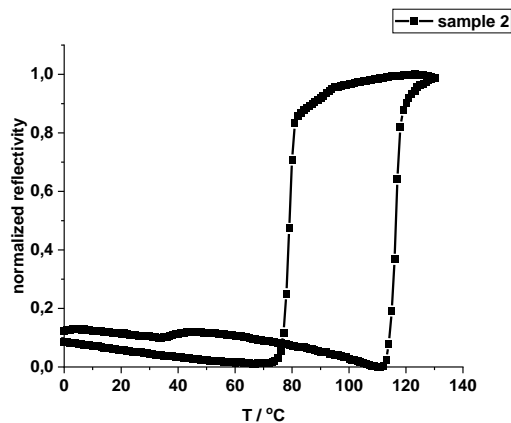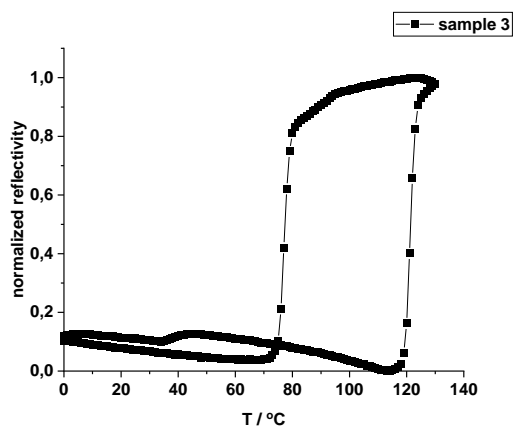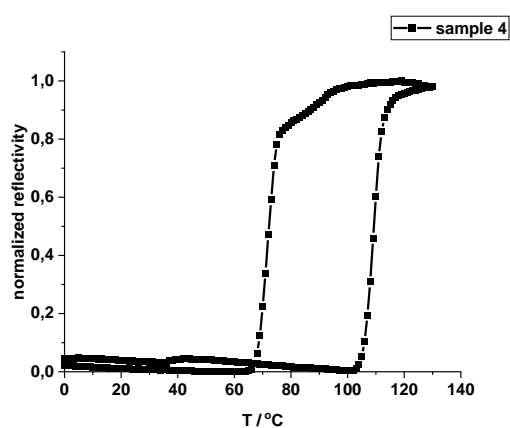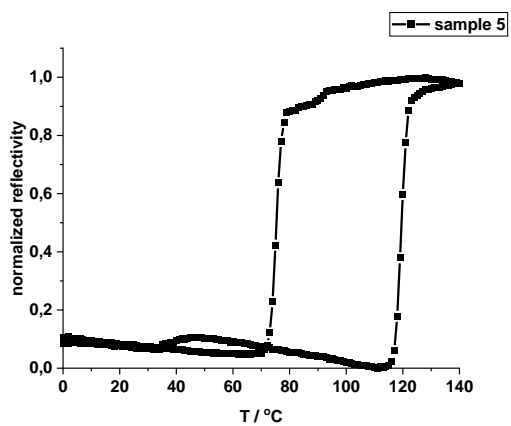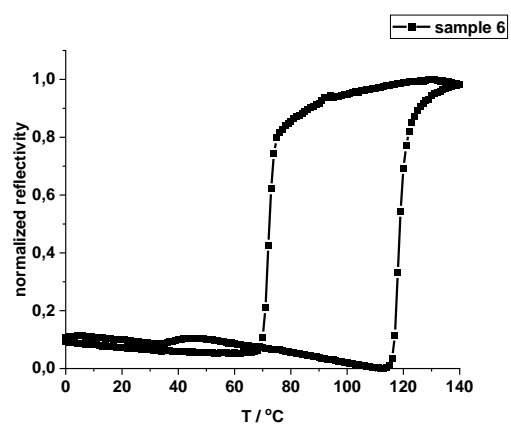

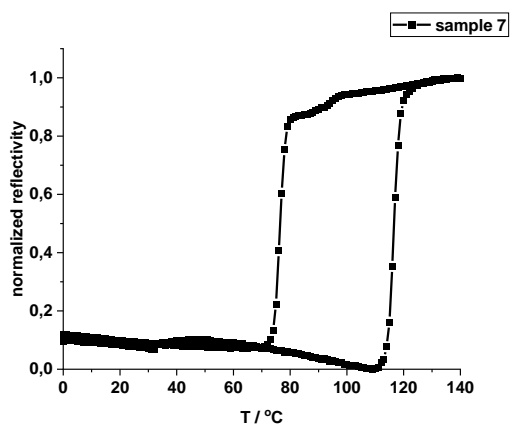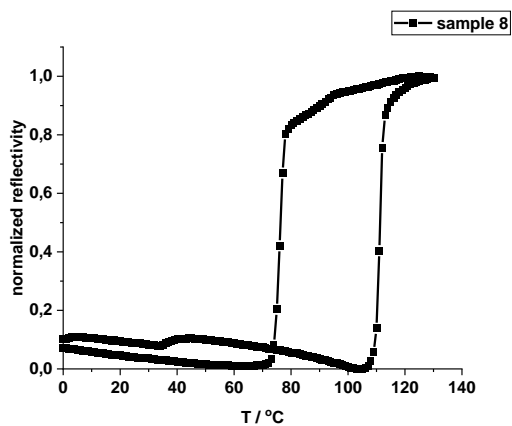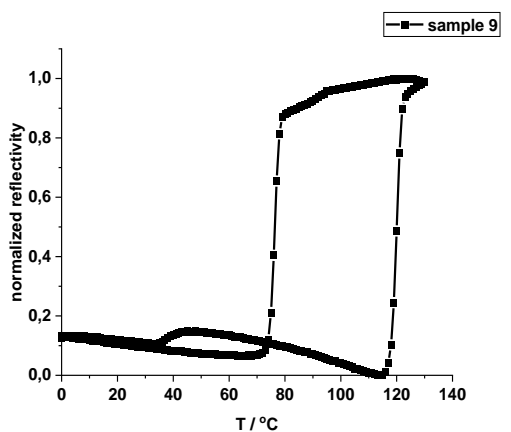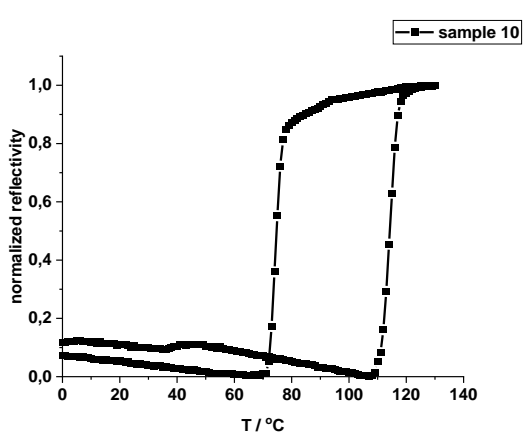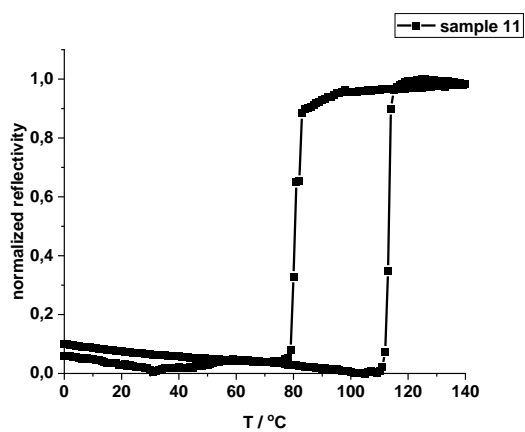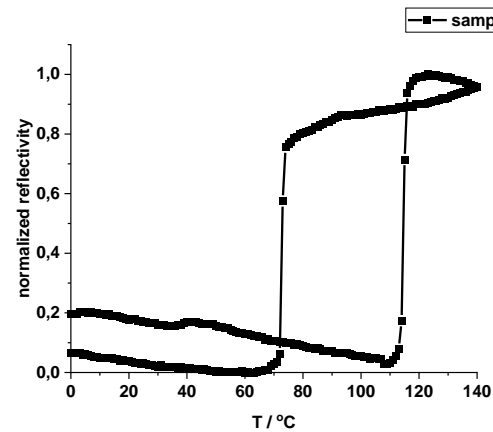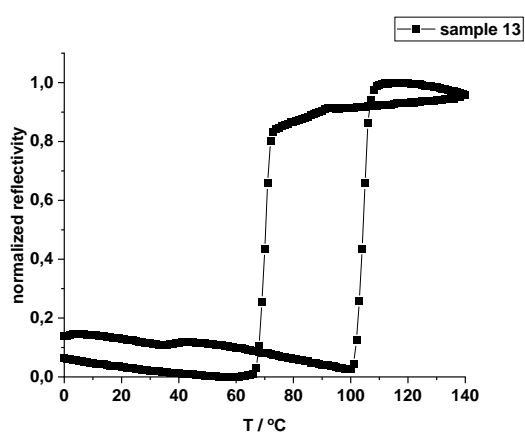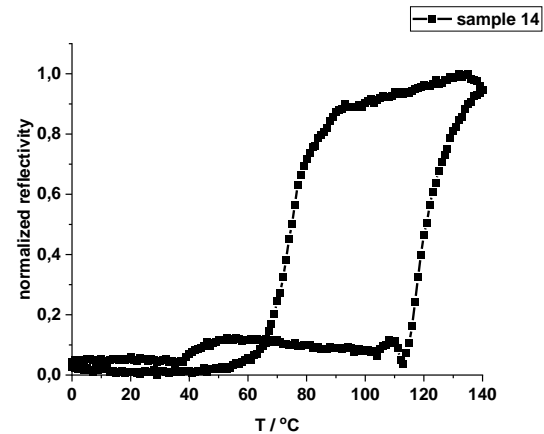

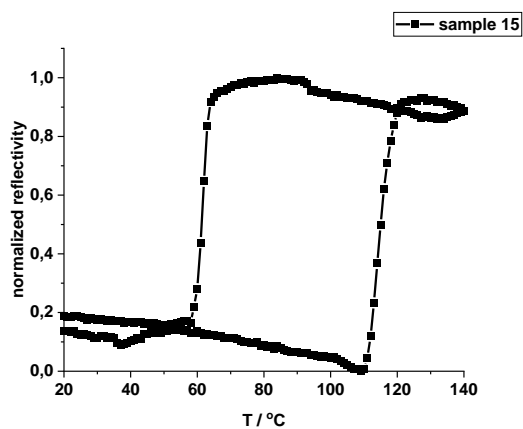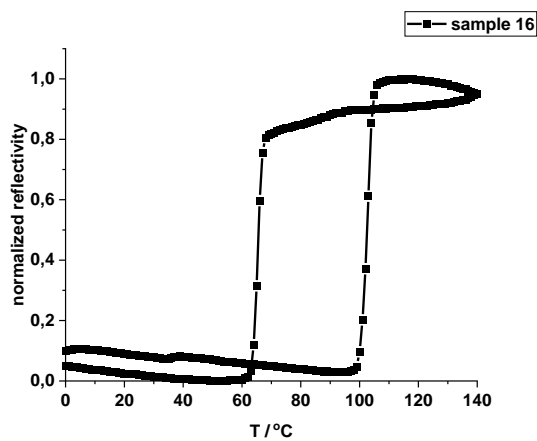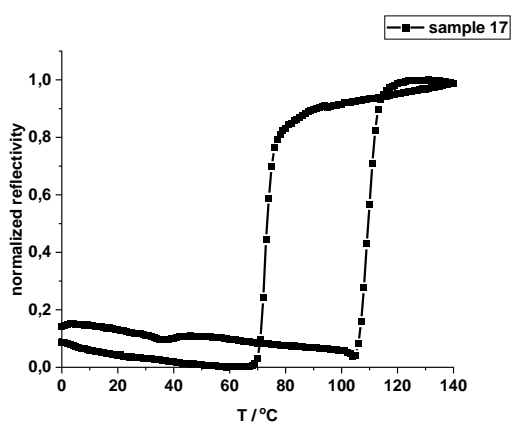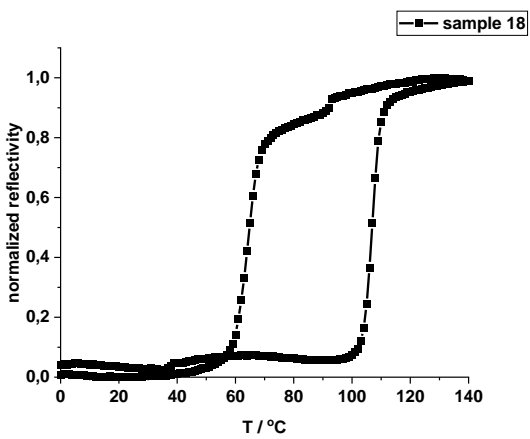

**Figure S4:** Optical reflectivity measurements for samples 1-18
